# Supplementary material for: The burden of unexpected costs in medical school
Source: PubMed Central journal article supplement (PMC11620594; doi:10.1371/journal.pone.0312401), 2024-12-05
Supplement: pone.0312401.s001.pdf [file pone.0312401.s001.pdf]

**Background information**

**School type**

- Public MD
- Private MD
- Public DO
- Private DO
- M1
- M2
- M3
- M4
- Graduate student, professional student years
- Research/Year out
- Other

**What is your class year?**

**If other, please describe**

**Are you a first generation college student? (i.e. first of immediate family members to graduate from college)**

- Yes
- No
- Unsure
- Prefer not to answer

**Are you a first generation medical student? (i.e. first of immediate family members to graduate from medical school)**

- Yes
- No
- Unsure
- Prefer not to answer

**Do you receive financial support from parents, grandparents, etc.? (tuition, rent, monthly allowance, groceries, etc).**

- Yes
- No
- Prefer not to answer

**What is your current household income? This includes any financial support during medical school from spouses, parents, grandparents, caregivers, etc.**

\$0K \$400K +

Change the slider above to set a response

  
[reset](#)

**What is your estimated debt after graduating medical school? Please include all anticipated debt.**

\$0K \$400K +

Change the slider above to set a response

  
[reset](#)

**Are you receiving a tuition scholarship?**

- Yes, full
- Yes, partial
- Yes, MSTP or other PhD funded program
- No
- Prefer not to answer

**Unexpected Costs**

Think about costs that are NOT required and not necessarily listed in estimated cost of attendance - things suggested by peers, faculty, advisors, etc.

To the best of your abilities, please estimate the following:

How much you spent on supplies/materials for clinical duties (ex: stethoscope, ophthalmoscope, reflex hammer, pen light, tuning fork, suture kits, tablet)

\$0 \$5000+



Change the slider above to set a response

  
[reset](#)

How much you spent on test prep/3rd party resources (ex: UWorld, Amboss, Sketchy, First Aid, Boards and Beyond, Pathoma, Osmosis, anatomy subscriptions, NBME practice tests)

\$0 \$5000+



Change the slider above to set a response

  
[reset](#)

How much you spent on clothing and attire appropriate for the hospital/clinic (business outfits, dress shoes, haircuts)

\$0 \$5000+



Change the slider above to set a response

  
[reset](#)

How much you spent on textbooks for preclinical and clinical duties (including online copies of textbooks)

\$0 \$5000+



Change the slider above to set a response

  
[reset](#)

How much you spent on required board exams (Step 1, 2)

\$0 \$5000+



Change the slider above to set a response

  
[reset](#)

How much you spent on social/student fees (social activities/outings, school clothes and gear, student fees)

\$0 \$5000+



Change the slider above to set a response

  
[reset](#)

How much you spent on residency fees (travel, hotel, application fees, background check fees). If this does not apply to you, leave it blank.

\$0 \$15000+



Change the slider above to set a response

  
[reset](#)

Please mark the items that were required/included in the estimated costs given to you by your school.

- Supplies/materials for clinical duties
- Test prep/3rd party resources
- Clothing for clinic/hospital duties
- Textbooks (or online copies)
- Required exams (Step 1, 2)
- Residency fees
- Social/student fees

Does your school offer any programs for additional financial support?

- Yes
- No
- Unsure

Please describe the financial support provided by your medical school

### Impact

Please rate the following statements

|                                                                                                                 | Strongly disagree     | Disagree                                      | Neutral               | Agree                 | Strongly agree        |
|-----------------------------------------------------------------------------------------------------------------|-----------------------|-----------------------------------------------|-----------------------|-----------------------|-----------------------|
| I spent more money out of pocket during medical school than expected                                            | <input type="radio"/> | <input type="radio"/>                         | <input type="radio"/> | <input type="radio"/> | <input type="radio"/> |
| The total cost of attendance listed by my medical school accurately predicted my expenses during medical school | <input type="radio"/> | <input type="radio"/>                         | <input type="radio"/> | <input type="radio"/> | <input type="radio"/> |
| The cost of additional resources has been a financial constraint at some point in my medical career             | <input type="radio"/> | <input type="radio"/>                         | <input type="radio"/> | <input type="radio"/> | <input type="radio"/> |
| Financial concerns have impacted my mental health and well-being at some point in my medical career             | <input type="radio"/> | <input type="radio"/>                         | <input type="radio"/> | <input type="radio"/> | <input type="radio"/> |
| I felt like I spent ___ I expected for resources directly applicable to my medical education                    |                       |                                               |                       |                       |                       |
|                                                                                                                 |                       | <input type="radio"/> Significantly less than |                       |                       |                       |
|                                                                                                                 |                       | <input type="radio"/> The same as             |                       |                       |                       |
|                                                                                                                 |                       | <input type="radio"/> Significantly more than |                       |                       |                       |

### Demographics

**Age**

18 50

Change the slider above to set a response

**How would you describe your gender?**

- Man
- Woman
- Non-binary/non-conforming
- Other
- Prefer not to answer

**How would you describe your race?**

- American Indian or Alaska Native
- Asian
- Black or African American
- Native Hawaiian or Pacific Islander
- White
- Prefer not to answer

**Are you of Hispanic, Latino/a, or Spanish origin?**

- Yes
- No
- Prefer not to answer
